# Supplementary material
Source: PubMed Central journal article supplement (PMC1570446)
Supplement: 7601312s2.pdf [file 7601312s2.pdf]

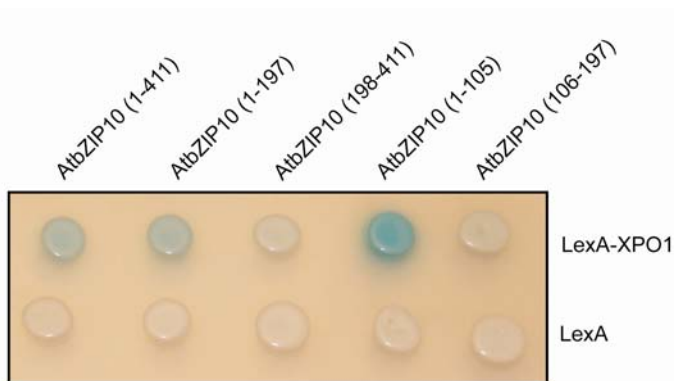

**Supplemental Figure 2. AtbZIP10 interacts with the Arabidopsis export receptor AtXPO1 in yeast.**

Interaction of the Arabidopsis nuclear export receptor AtXPO1 with full-length AtbZIP10 and different AtbZIP10 polypeptides in the yeast two-hybrid system. The DNA constructs expressing AtXPO1 fused to the LexA binding domain (LexA-XPO1) and the AtbZIP10 fragments fused to the B42 activation domain were co-transformed in the indicated combinations into yeast strain EGY48[p8op-lacZ]. Transformed cells were dotted onto galactose induction plates containing X-Gal to assay for  $\beta$ -galactosidase activity (blue staining). The control assays were performed with a construct expressing LexA alone.
