# Supplementary material
Source: PubMed Central journal article supplement (PMC1570446)
Supplement: 7601312s3.pdf [file 7601312s3.pdf]

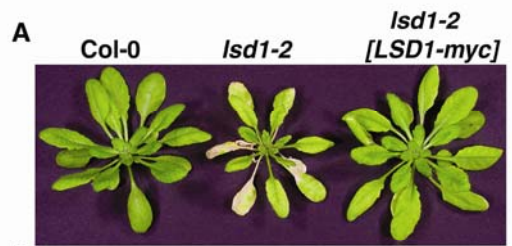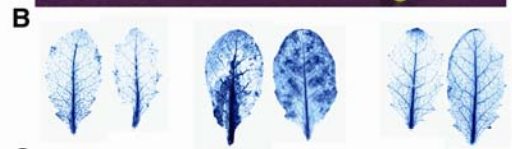

**C**

|                                                | Col-0 | <i>Isd1-2</i> | <i>Isd1-2</i><br>[ <i>LSD1-myc</i> ] |
|------------------------------------------------|-------|---------------|--------------------------------------|
| Leaves with macroscopically visible cell death | 0/20  | 14/20         | 0/20                                 |

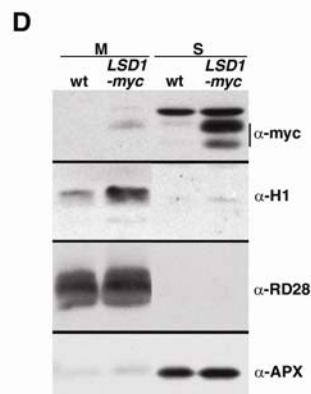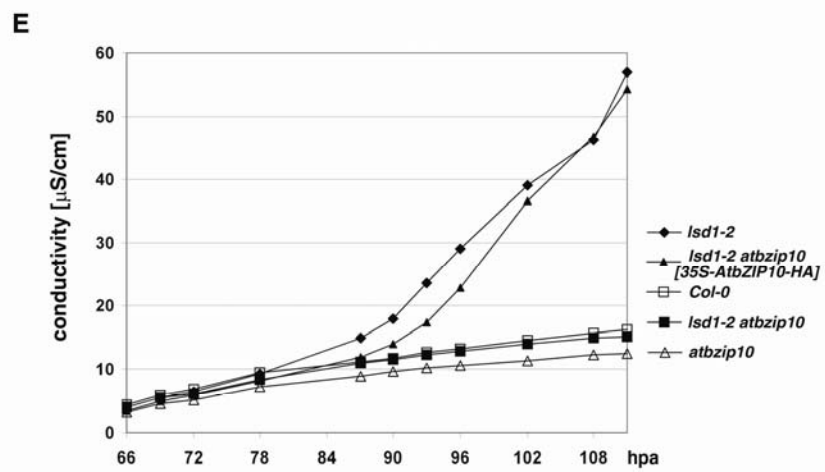

**Supplemental Figure 3. LSD1-myc and AtbZIP10-HA complement their respective null alleles.** **(A)** Four week old Col-0, *lsd1-2* and *lsd1-2* plants complemented with an *LSD1-myc* construct driven by its native promoter were sprayed with 150  $\mu$ M BTH. Absence of runaway cell death indicates complementation. **(B)** Leaves from plants shown in (A) were stained with Trypan Blue to visualize *lsd1* rcd. **(C)** Quantification of the experiment shown in **(A)**. **(D)** Sub-cellular localization of LSD1-myc. Protein was extracted from three week old Col-0 wt and LSD1-myc plants and fractionated as described in Materials and methods. S, soluble fraction; M, microsomal and nucleus-enriched fraction;  $\alpha$ -myc, myc-epitope tagged LSD1 protein;  $\alpha$ -H1, nuclear Histone H1 protein;  $\alpha$ -RD28, membrane specific RD28 marker;  $\alpha$ -APX, detects soluble ascorbate peroxidase. **(E)** Four week old plants of the genotypes denoted on the right were sprayed with 150  $\mu$ M BTH. Tissue was harvested at 64 hpa and processed as described in Materials and methods. hpa, hours after application.
