# Supplementary material
Source: PubMed Central journal article supplement (PMC1570446)
Supplement: 7601312s4.pdf [file 7601312s4.pdf]

|                     | <b>Compared to</b>         | <b>DF</b> | <b>Chi<sup>2</sup></b> | <b>P-value</b> | <b>Significant*</b> |
|---------------------|----------------------------|-----------|------------------------|----------------|---------------------|
| Col-0               | Col-0 (+Est)               | 2         | 0.45                   | 0.7985         | <b>No</b>           |
| Col-0               | <i>lsd1-2</i>              | 2         | 114.96                 | <0.0001        | <b>Yes</b>          |
| Col-0               | <i>lsd1-2 atbzip10</i>     | 2         | 114.96                 | <0.0001        | <b>Yes</b>          |
| Col-0               | <i>atbzip10</i>            | 2         | 11.92                  | 0.0026         | <b>Yes</b>          |
| Col-0               | <i>35S-AtbZIP10</i>        | 2         | 16.01                  | 0.0003         | <b>Yes</b>          |
| Col-0 (+Est)        | <i>Est-AtbZIP10</i>        | 2         | 0.35                   | 0.8395         | <b>No</b>           |
| Col-0 (+Est)        | <i>Est-AtbZIP10 (+Est)</i> | 2         | 26.10                  | <0.0001        | <b>Yes</b>          |
| <i>Est-LSD1</i>     | <i>Est-LSD1 (+Est)</i>     | 2         | 4.04                   | 0.1327         | <b>No</b>           |
| <i>atbzip10</i>     | <i>35S-AtbZIP10</i>        | 2         | 24.51                  | <0.0001        | <b>Yes</b>          |
| <i>Est-AtbZIP10</i> | <i>Est-AtbZIP10 (+Est)</i> | 2         | 21.01                  | <0.0001        | <b>Yes</b>          |

**Supplemental Table 1: Test of Significance for data presented in Figure 6B**

\* Contingency Table Analysis of experimental comparisons. Bonferroni corrected P-value=0.005
