# Supplementary material
Source: PubMed Central journal article supplement (PMC1570446)
Supplement: 7601312s5.pdf [file 7601312s5.pdf]

|                     | <b>Compared to</b>         | <b>DF</b> | <b>Chi<sup>2</sup></b> | <b>P-value</b> | <b>Significant*</b> |
|---------------------|----------------------------|-----------|------------------------|----------------|---------------------|
| Col-0               | Col-0 (+Est)               | 4         | 0.49                   | 0.9745         | <b>No</b>           |
| Col-0               | <i>Isd1-2</i>              | 4         | 90.85                  | <0.0001        | <b>Yes</b>          |
| Col-0               | <i>Isd1-2 atbzip10</i>     | 4         | 35.38                  | <0.0001        | <b>Yes</b>          |
| Col-0               | <i>atbzip10</i>            | 4         | 11.37                  | 0.0227         | <b>No</b>           |
| Col-0               | <i>35S-AtbZIP10</i>        | 4         | 15.96                  | 0.0031         | <b>Yes</b>          |
| Col-0 (+Est)        | <i>Est-AtbZIP10</i>        | 4         | 0.53                   | 0.9705         | <b>No</b>           |
| Col-0 (+Est)        | <i>Est-AtbZIP10 (+Est)</i> | 4         | 17.36                  | 0.0016         | <b>Yes</b>          |
| <i>Est-LSD1</i>     | <i>Est-LSD1 (+Est)</i>     | 4         | 5.01                   | 0.2863         | <b>No</b>           |
| <i>Isd1-2</i>       | <i>Isd1-2 atbzip10</i>     | 4         | 24.87                  | <0.0001        | <b>Yes</b>          |
| <i>atbzip10</i>     | <i>35S-AtbZIP10</i>        | 4         | 41.59                  | <0.0001        | <b>Yes</b>          |
| <i>Est-AtbZIP10</i> | <i>Est-AtbZIP10 (+Est)</i> | 4         | 17.16                  | 0.0018         | <b>Yes</b>          |

**Supplemental Table 2: Test of Significance for data presented in Figure 6C**

\* Contingency Table Analysis of experimental comparisons. Bonferroni corrected P-value=0.0045
