# Supplementary material
Source: PubMed Central journal article supplement (PMC1570446)
Supplement: 7601312s6.pdf [file 7601312s6.pdf]

|                            | Compared to                       | DF | Chi <sup>2</sup> | P-value | Significant* |
|----------------------------|-----------------------------------|----|------------------|---------|--------------|
| Col-0                      | Col-0 (+Est)                      | 4  | 0.12             | 0.9983  | No           |
| Col-0                      | <i>Isd1-2</i>                     | 4  | 39.72            | <0.0001 | Yes          |
| Col-0                      | <i>35S-AtbZIP10 Isd1-2</i>        | 4  | 67.2             | <0.0001 | Yes          |
| <i>Isd1-2</i>              | <i>35S-AtbZIP10 Isd1-2</i>        | 4  | 9.17             | 0.057   | No           |
| <i>Isd1-2</i>              | <i>Est-AtbZIP10 Isd1-2 (+Est)</i> | 4  | 19.2             | 0.0007  | Yes          |
| <i>Est-AtbZIP10 Isd1-2</i> | <i>Est-AtbZIP10 Isd1-2 (+Est)</i> | 4  | 80.64            | <0.0001 | Yes          |

**Supplemental Table 3: Test of Significance for data presented in Figure 6D**

\* Contingency Table Analysis of experimental comparisons. Bonferroni corrected P-value=0.007
